# Supplementary material for: Engineering Bacillus licheniformis for the production of meso-2,3-butanediol
Source: PubMed Central journal article supplement (PMC4890260; doi:10.1186/s13068-016-0522-1), 2016-06-02
Supplement: 13068_2016_522_MOESM1_ESM.pdf [file 13068_2016_522_MOESM1_ESM.pdf]

WX-02GDH MSKSVKSVTSPPKFFITGKRLLENNDVIEDFDGNAYITCDEFILERRAQKEAGNSIQKAGNQAVFEKFNVECTQEBIDRNRRLARNAGANILVIGIGGGKTLDTAKATAYYEKLPVVIPTIASTDAPCSAL 130  
BIGIdA MSKSVKSVTSPPKFFITGKRLLENNDVIEDFDGNAYITCDEFILERRAQKEAGNSIQKAGNQAVFEKFNVECTQEBIDRNRRLARNAGANILVIGIGGGKTLDTAKATAYYEKLPVVIPTIASTDAPCSAL 130  
EcGIdA ---MDRIIQSPGKYIQGADVINRLEGYLLKPLAERWLVVGDKFLVGFQSTVEKSPKDAAGLVVETIAPGGECSONEIDRLRGAETAQCGALLGTGGGKTLDTAKALAHFMGVFVAIAPTIASTDAPCSAL 127  
SsGIdA ---MDRIIQSPGKYIQGADVINRLEGYLLKPLAERWLVVGDKFLVGFQSTVEKSPKDAAGLVVETIAPGGECSONEIDRLRGAETAQCGALLGTGGGKTLDTAKALAHFMGVFVAIAPTIASTDAPCSAL 127  
CfGIdA ---MDRIIQSPGKYIQGADVITRLGGYLLKPLAERWLVVGDKFLVGFQGALEKSPQDAAGLALVETIAPGGECSONEIDRLRVVAKKQCAAVLIGIGGGKTLDTAKALAHFMGVFVAIAPTIASTDAPCSAL 127  
SeGIdA ---MDRIIQSPGKYIQGANVIAIRLGDYLLKPMANNWLVVGDKFLVGFQSTVEKSPKDAAGLALVETIAPGGECSONEIDRLRAVAKKQCGAVLIGIGGGKTLDTAKALAHFMGVFVAIAPTIASTDAPCSAL 127  
KpGIdA ---MDRIIQSPGKYIQGAGATKRLGDYLLKPLAERWLVVGDKFLVGFQSTVEKSPKDAAGLALVETIAPGGECSONEIDRLRGAETAQCGALLGTGGGKTLDTAKALAHFMGVFVAIAPTIASTDAPCSAL 127  
KoGIdA ---MDRIIQSPGKYIQGADVITRLGGYLLKPLAERWLVVGDKFLVGFQSTVEKSPKDAAGLALVETIAPGGECSONEIDRLRGAETAQCGALLGTGGGKTLDTAKALAHFMGVFVAIAPTIASTDAPCSAL 127  
EncGIdA ---MDRIIQSPGKYIQGADVITRLGGYLLKPLAERWLVVGDKFLVGFQSTVEKSPKDAAGLALVETIAPGGECSONEIDRLRGAETAQCGALLGTGGGKTLDTAKALAHFMGVFVAIAPTIASTDAPCSAL 127  
CfDhaD ---MLKVIQSPAKYLQCPDASTLFGQVAKNLADEFFVIADDFVMKLAGKVLNGLHSHDISCHAERFNGECSHBINRLIAHLKQHGCRGVVIGIGGGKTLDTAKAIGYQKLPVVVPTIASTDAPTAL 127  
KoDhaD ---MLKVIQSPAKYLQCPDASTLFGQVAKNLADEFFVIADDFVMKLAGKVLNGLHSHDISCHAERFNGECSHBINRLIAHLKQHGCRGVVIGIGGGKTLDTAKAIGYQKLPVVVPTIASTDAPTAL 127  
KpDhaD ---MLKVIQSPAKYLQCPDAAVLFGQVAKNLADEFFVIADDFVMKLAGKVLNGLHSHDISCHAERFNGECSHBINRLIAHLKQHGCRGVVIGIGGGKTLDTAKAIGYQKLPVVVPTIASTDAPTAL 127  
SmGIdA ---MLRIIQSPGKYIQGANALAAVGEVAKSLADHYFVIADDFVMQLAGDTLMGSLRQHCVKHHAARENGECRKEIDRLGCELQTHGCRGVVIGIGGGKTLDTAKAVAHYQRLPVVLPPTIASTDAPTAL 127  
GsGIdA ---MAAEKRVFISPPAKYVQGNVITKIANVYEGIGNKTVIADDEIYWKIAGHTLVNGLKKNIAAEEVVESSGASRNEVERIANARKAABAVVIGVGGGKTLDTAKAVADELDAYIVPTIASTDAPTAL 129  
CbDhaD ---MRKAFICPPKRYVQGEDDILNLGYFVRSFGESALDIAHKDDVTRVKDKLNKTCFKKISFVSESGKGCESREVEVCRLLQALASENKSCICIGGGGKAIDTAKCVAEGEAL--ILVPTIATDAPTALSHS 125

\*\*\*\* \* \*

WX-02GDH AVIYKHDGSEFDRYLFPTNPDVVLADSEILASAPPRFFAAGIGDALATYFEARACFKANGDNVLVM-----KPSTTGLGLARLCYDTLLENGVKAMQAVKHGVS TRAVIDTEATILYLSGVGA 248  
BIGIdA AVIYKHDGSEFDRYLFPTNPDVVLADSEILASAPPRFFAAGIGDALATYFEARACFKANGDNVLVM-----KPSTTGLGLARLCYDTLLENGVKAMQAVKHGVS TRAVIDTEATILYLSGVGA 248  
EcGIdA SVIYTDGEGFDRYLLPNNPNMVVVDTKIVAGAPARLLAAGIGDALATWFEARACSRSGATTMAGG-----KCTQAAALALAECLYNTLLEEGEKAMLAEEQHVVTPALERVI EANTYLSGVGF 245  
SsGIdA SVIYTDGEGFDRYLLPNNPNMVVVDTKIVAGAPARLLAAGIGDALATWFEARACSRSGATTMAGG-----KCTQAAALALAECLYNTLLEEGEKAMLAEEQHVVTPALERVI EANTYLSGVGF 245  
CfGIdA SVIYTDAGEFDRYLLPNNPNRIVVDTKIVAGAPARLLAAGIGDALATWFEARACSRSGATTMAGG-----QCTQAAALALAECLYNTLLEEGEKAMLAEEQHVVTPALERVI EANTYLSGVGF 245  
SeGIdA SVIYTDAGEFDRYLLPNNPNMVVVDTKIVAGAPARLLAAGIGDALATWFEARACSRSGATTMAGG-----KCTQAAALALAECLYNTLLEEGEKAMLAEEQHVVTPALERVI EANTYLSGVGF 245  
KpGIdA SVIYTDGEGFDSYLLMPLRNPVMVVDTKIVAGAPARLLAAGIGDALATWFEARACSRSGATTMAGG-----KCTQAAALALAECLYNTLLEEGEKAMLAEEQHVVTPALERVI EANTYLSGVGF 245  
KoGIdA SVIYTDGEGFDSYLLMPLRNPVMVVDTKIVAGAPARLLAAGIGDALATWFEARACSRSGATTMAGG-----KCTQAAALALAECLYNTLLEEGEKAMLAEEQHVVTPALERVI EANTYLSGVGF 245  
EncGIdA SVIYTDGSEFFERYLLMPLRNPVIVVDTKVVAAGAPPRLAAGIGDALATWFEARACSRSGATTMAGG-----KCTQAAALALAECLYNTLLEEGEKAMLAEEQHVVTPALERVI EANTYLSGVGF 245  
CfDhaD SVIYTEAGEFEFFYLIYKPNPDMVMDTAIIAKAPVRLLVAGMGDALSTWFEAKACYDARATSMAGG-----QSTAAALSLARLCYDTLLAEGEKARFAAQGVVTDALERI EANTYLSGEGF 245  
KoDhaD SVIYTEAGEFEFFYLIYKPNPDMVMDTAIIAKAPVRLLVAGMGDALSTWFEAKACYDARATSMAGG-----QSTAAALSLARLCYDTLLAEGEKARFAAQGVVTDALERI EANTYLSGEGF 245  
KpDhaD SVIYTEAGEFEFFYLIYKPNPDMVMDTAIIAKAPVRLLVAGMGDALSTWFEAKACYDARATSMAGG-----QSTAAALSLARLCYDTLLAEGEKARFAAQGVVTDALERI EANTYLSGEGF 245  
SmGIdA SVIYTEAGEFEFFYLIYKPNPDMVMDTAIIAKAPVRLLVAGMGDALSTWFEAKACYDARATSMAGG-----KSTAAALSLARLCYDTLLAEGVKAKLVAGVVTDAVERI EANTYLSGEGF 245  
GsGIdA SVIYSDGCFWFSRFFYKKNPDDVVDTKLIANAPPRLAAGIGDALATWFEARACSRSGATTMAGG-----IPTAAALAEKCEQTLFKYQKLAYESVKARVTPALERI EANTYLSGEGF 247  
CbDhaD AVIYTDGEGFDRYLLPNNPNMVVVDTKIVAGAPARLLAAGIGDALATWFEARACSRSGATTMAGG-----KCTQAAALALAECLYNTLLEEGEKAMLAEEQHVVTPALERVI EANTYLSGVGF 255

WX-02GDH BSGGLAAAHAINHGMTAVP-SLHRAQHGKVFVGLLAQLVLENAPAELETVIDFIKGVGLPHTLKDLDGVDFVVEERWQVAQSAACEGDTMGNMPPFVTPDDVYNATVAANAIAESYHD----- 367  
BIGIdA BSGGLAAAHAINHGMTAVP-SLHRAQHGKVFVGLLAQLVLENAPAELETVIDFIKGVGLPHTLKDLDGVDFVVEERWQVAQSAACEGDTMGNMPPFVTPDDVYNATVAANAIAESYHD----- 367  
EcGIdA BSGGLAAAHAVHNGLTAVP-DAHHYHGEKVAFGTLTQVLENAPVEEIEETVAALSHAVGLPITLAQLDLEKEDVPAKMRIVAEAAACEGTTIHNMPGGATPDQVYAAALVADQYGGORFLQEWEE-- 367  
SsGIdA BSGGLAAAHAVHNGLTAVP-DAHHYHGEKVAFGTLTQVLENAPVEEIEETVAALSHAVGLPITLAQLDLEKEDVPAKMRIVAEAAACEGTTIHNMPGGATPDQVYAAALVADQYGGORFLQEWEE-- 367  
CfGIdA BSGGLAAAHAINHGLTAVP-DAHHYHGEKVAFGTLTQVLENAPVEEIEETVAALCHSVGLPITLAQLDLEKEDVPAKMRIVAEAAACEGTTIHNMPGGATPDQVYAAALVADQYGGORFLQEWEE-- 367  
SeGIdA BSGGLAAAHAINHGLTAVP-DAHHYHGEKVAFGTLTQVLENAPVEEIEETVAALCHSVGLPITLAQLDLEKEDVPAKMRIVAEAAACEGTTIHNMPGGATPDQVYAAALVADQYGGORFLQEWEE-- 367  
KpGIdA BSGGLAAAHAINHGLTAVP-DAHHYHGEKVAFGTLTQVLENAPVEEIEETVAALCHSVGLPITLAQLDLEKEDVPAKMRIVAEAAACEGTTIHNMPGGATPDQVYAAALVADQYGGORFLQEWEE-- 367  
KoGIdA BSGGLAAAHAINHGLTAVP-DAHHYHGEKVAFGTLTQVLENAPVEEIEETVAALCHSVGLPITLAQLDLEKEDVPAKMRIVAEAAACEGTTIHNMPGGATPDQVYAAALVADQYGGORFLQEWEE-- 367  
EncGIdA BSGGLAAAHAINHGMATAVP-DAHHYHGEKVAFGTLTQVLENAPVEEIEETVAALCHSVGLPITLAQLDLEKEDVPAKMRIVAEAAACEGTTIHNMPGGATPDQVYAAALVADQYGGORFLQEWEE-- 367  
CfDhaD BSSGLAGAHAINHGFITILE-ECHELLYHGEKVAFGTLAQLVLENAPVEEIEETVNLFCQKTVGLPVTLAQMGVKEGIDDKIMAVAKATCAEGETIHNMPFVTSQVSHAALLTADLLGQWRLAR---- 367  
KoDhaD BSSGLAAAHAINHGFITILE-ECHELLYHGEKVAFGTLAQLVLENAPVEEIEETVNLFCQKTVGLPVTLAQMGVKEGIDDKIMAVAKATCAEGETIHNMPFVTSQVSHAALLTADLLGQWRLAR---- 365  
KpDhaD BSSGLAAAHAINHGFITILE-ECHELLYHGEKVAFGTLAQLVLENAPVEEIEETVNLFCQKTVGLPVTLAQMGVKEGIDDKIMAVAKATCAEGETIHNMPFVTSQVSHAALLTADLLGQWRLAR---- 365  
SmGIdA BSSGLAAAHAINHGFITILE-ECHELLYHGEKVAFGTLAQLVLENAPVEEIEETVNLFCQKTVGLPVTLAQMGVKEGIDDKIMAVAKATCAEGETIHNMPFVTSQVSHAALLTADLLGQWRLAR---- 366  
GsGIdA BSGGLAAAHAINHGFITALEGIEHLLHGEKVAFGTLVQLALBEHSQOIEERYIEHYSLLDLPVLEDIKLDASREDILKVAKAATAEGETIHN-ARNVTTADDVADATFAADQYKAYEKKHKR-- 370  
CbDhaD BSGGLAGAHAINHGFITILE-GTRKYFHGEKVAFGTLAQLVLENAPVEEIEETVNLFCQKTVGLPVTLAQMGVKEGIDDKIMAVAKATCAEGETIHNMPFVTSQVSHAALLTADLLGQWRLAR---- 379



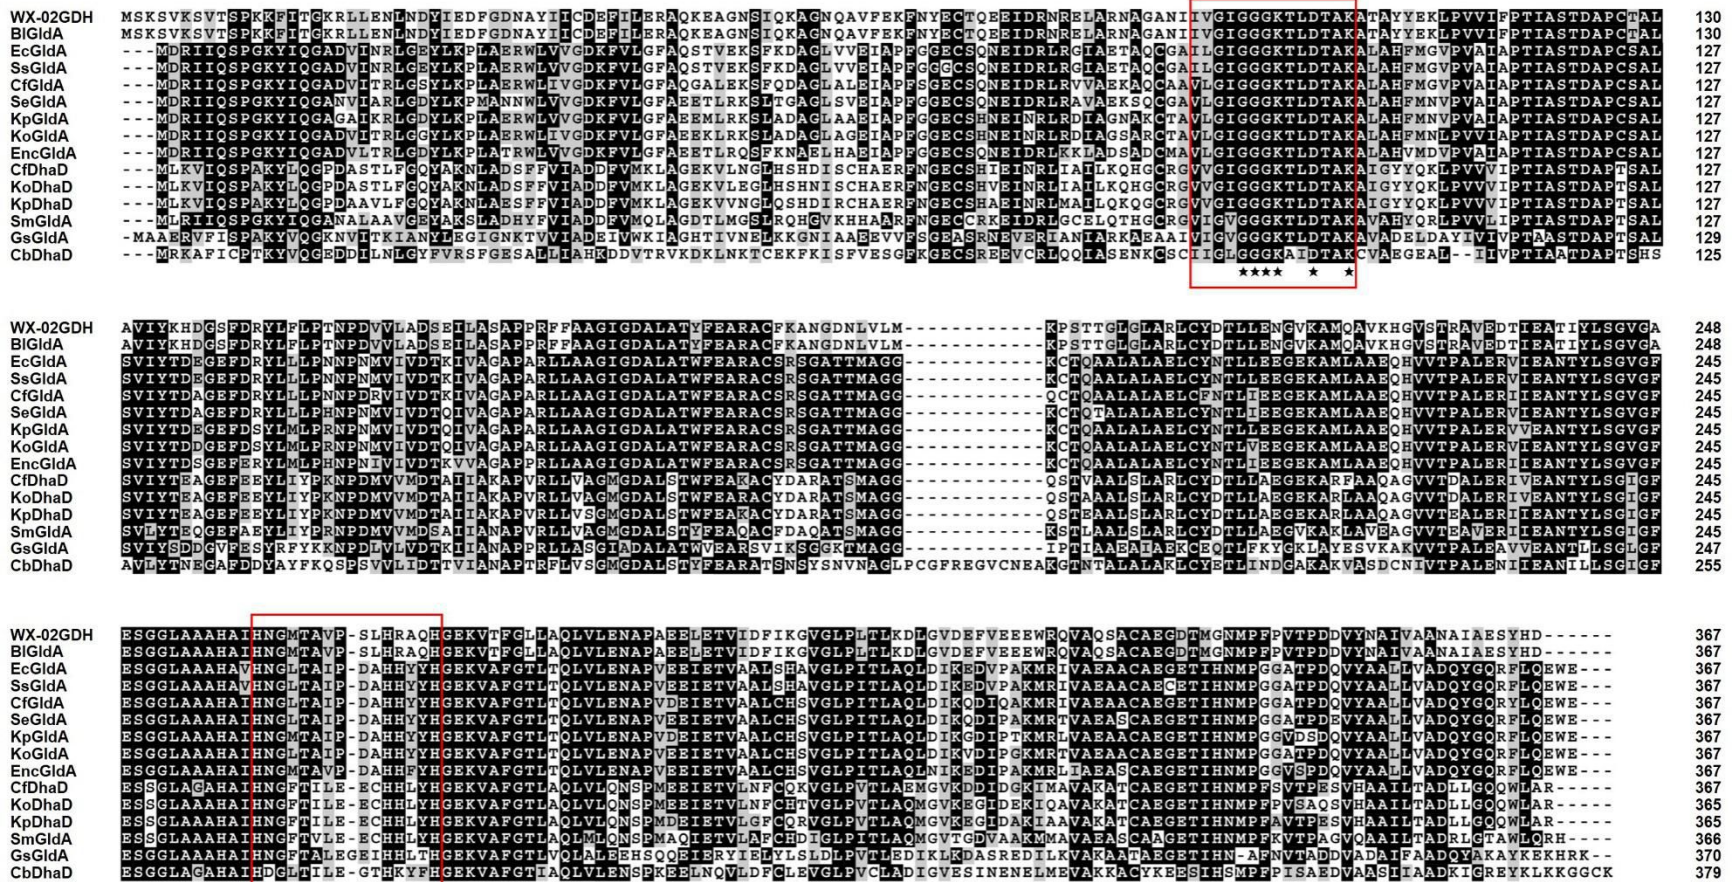

**Figure S1.** Multiple sequence alignments of GDH from *B. licheniformis* WX-02 (WX-02 GDH) with GDHs from other strains [*B. licheniformis* 10-1-A (BIGdA, AHW84748.1), *Escherichia coli* (EcGIdA, P0A9S6), *Shigella sonnei* (SsGIdA, YP\_005459262.1), *Citrobacter freundii* (CfGIdA, WP\_003847842.1), *Salmonella enterica* (SeGIdA, YP\_006888481.1), *Klebsiella pneumoniae* 280\_1220 (KpGIdA, EPP12735.1), *Klebsiella oxytoca* (KoGIdA, YP\_005017437.1), *Enterobacter cloacae* (EncGIdA, AFM62175), *Citrobacter freundii* (CfDhaD, P45511.1), *Klebsiella oxytoca* (KoDhaD, YP\_005016612), *Klebsiella pneumoniae* CGMCC1.6366 (KpDhaD,

KJ206474.1), *Serratia marcescens* H30 (SmGldA) [1], *Geobacillus stearothermophilus* (GsGldA, P32816), *Clostridium butyricum* (CbDhaD, AAN17729)]. The boxes indicate the putative coenzyme binding motif proposed as the signature of the iron-dependent ADH, and the box below indicates the residues involved in metal binding. The location of the conserved residues corresponding to coenzyme and metal binding sites are also marked with star and dot, respectively. Amino acid residues are numbered on the right.
