# Supplementary material for: Engineering Bacillus licheniformis for the production of meso-2,3-butanediol
Source: PubMed Central journal article supplement (PMC4890260; doi:10.1186/s13068-016-0522-1), 2016-06-02
Supplement: 13068_2016_522_MOESM3_ESM.pdf [file 13068_2016_522_MOESM3_ESM.pdf]

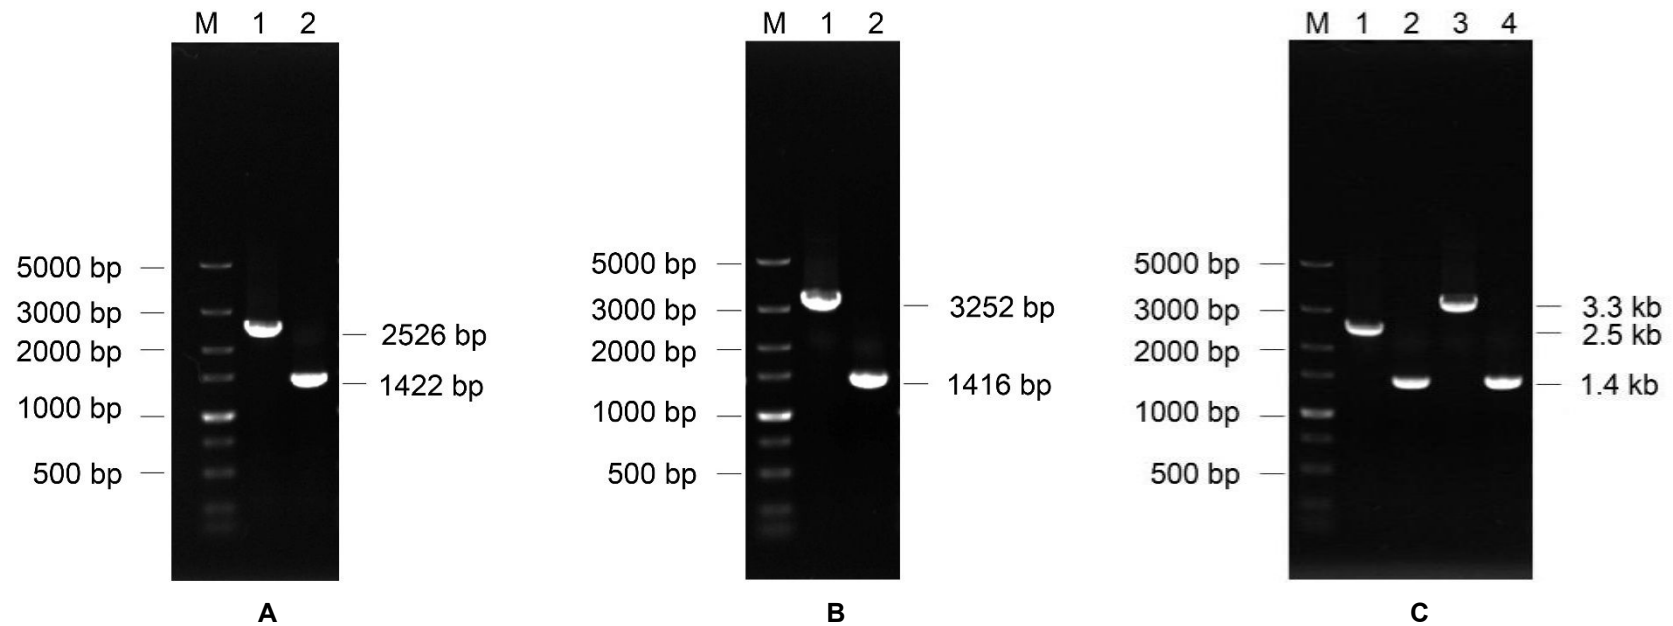

**Figure S3.** Confirmation of the recombinant strains of *B. licheniformis* by PCR amplification.

**(A)** Lane M: DL5000 marker; Lane 1: negative control (PCR products amplified from the wild strain WX-02 genome); Lane 2: PCR products amplified from WX-02 $\Delta$ *gdh* with the primers  $\Delta$ *gdh*-F and  $\Delta$ *gdh*-R

**(B)** Lane M: DL5000 marker; Lane 1: negative control (PCR products amplified from the wild strain WX-02 genome); Lane 2: PCR products amplified from WX-02 $\Delta$ *acoR* with the primers  $\Delta$ *acoR*-F and  $\Delta$ *acoR*-R

**(C)** Lane M: DL5000 marker; Lane 1 and 3: negative control (PCR products amplified from the wild strain WX-02 genome) with the primer pairs  $\Delta$ *gdh*-F/R and  $\Delta$ *acoR*-F/R, respectively; Lane 2 and 4: PCR products amplified from WX-02 $\Delta$ *gdh* $\Delta$ *acoR* with the primer pairs  $\Delta$ *gdh*-F/R and  $\Delta$ *acoR*-F/R, respectively.
