# Supplementary material for: Engineering Bacillus licheniformis for the production of meso-2,3-butanediol
Source: PubMed Central journal article supplement (PMC4890260; doi:10.1186/s13068-016-0522-1), 2016-06-02
Supplement: 13068_2016_522_MOESM4_ESM.pdf [file 13068_2016_522_MOESM4_ESM.pdf]

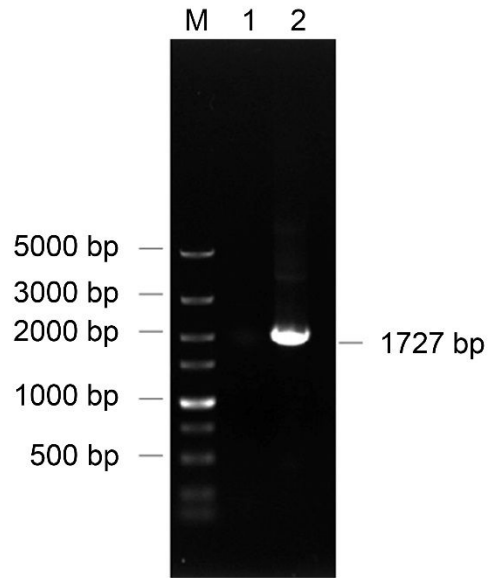

**Figure S4.** Confirmation of the mutant *B. licheniformis* WX-02 $\Delta$ *gdh*/pHY-*gdh* strain by PCR amplification.

*Lane M:* DL5000 marker; *Lane 1:* negative control (PCR products amplified from the wild strain WX-02); *Lane 2:* PCR products of fusion fragment of P43-*gdh*-TamyL from WX-02 $\Delta$ *gdh*/pHY-*gdh* with the primers P43-*gdh*-TamyL-1 and 6.
