# Supplementary material for: Engineering Bacillus licheniformis for the production of meso-2,3-butanediol
Source: PubMed Central journal article supplement (PMC4890260; doi:10.1186/s13068-016-0522-1), 2016-06-02
Supplement: 13068_2016_522_MOESM5_ESM.pdf [file 13068_2016_522_MOESM5_ESM.pdf]

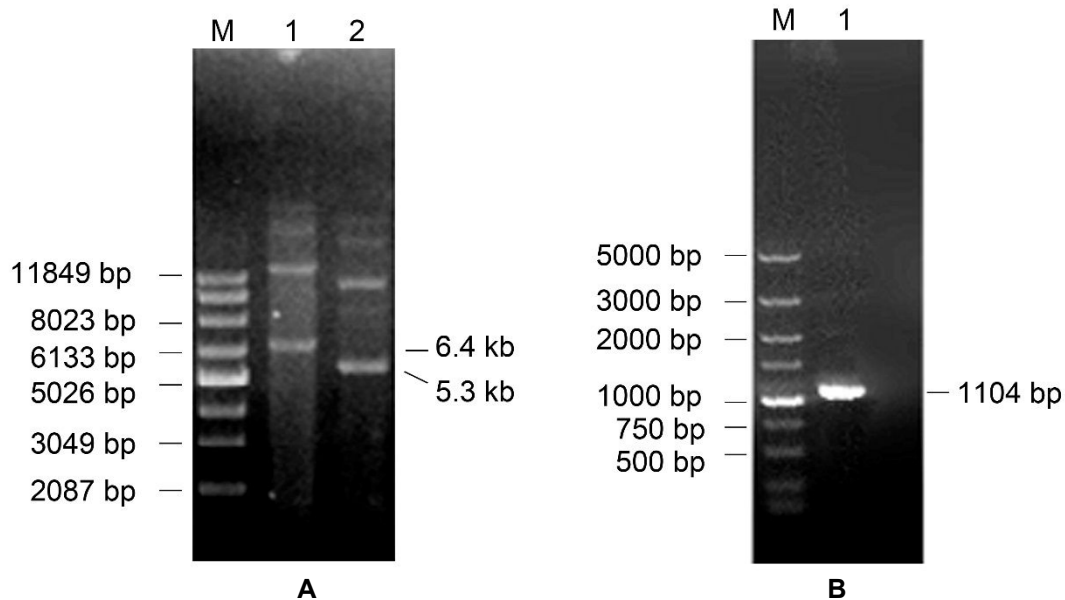

**Figure S5.** Analysis of the recombinant plasmid pET-*gdh* (A), and confirmation of the recombinant strain *E. coli* BL21(DE3)/ pET-*gdh* by PCR amplification (B)

**(A)** Lane M: Supercoiled DNA Ladder Marker; Lane 1: plasmid pET-*gdh* (6.4 kb); Lane 2: plasmid pET-28a(+) (5.3 kb)

**(B)** Lane M: DL5000 Marker; Lane 1: colony PCR products of the transformant BL21(DE3)/ pET-*gdh* (1.1 kb)
